# Supplementary material
Source: MDPI journal article supplement (https://www.mdpi.com/2072-4292/11/24/2975)
Supplement: s1 [file s1]

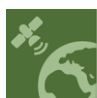

## Supplementary Materials

# Geophysical Investigation of the Neolithic Calanais Landscape

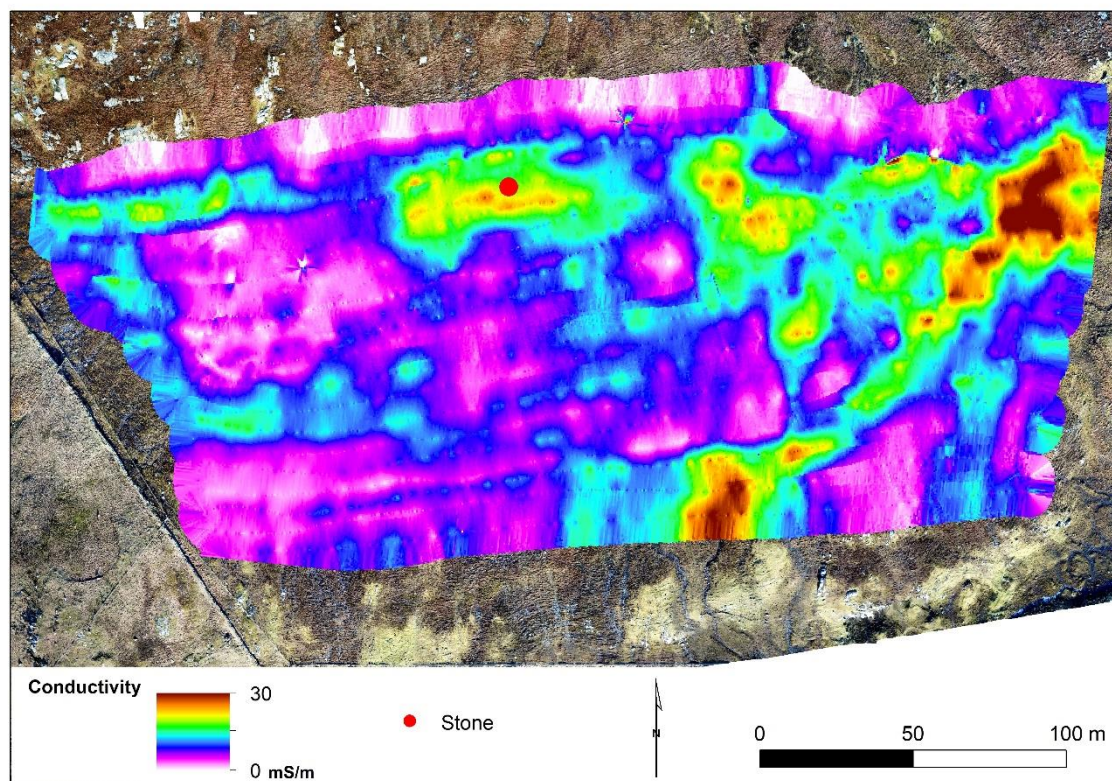

**Explorer C1.** Ground conductivity for CMD Explorer Coil 1.



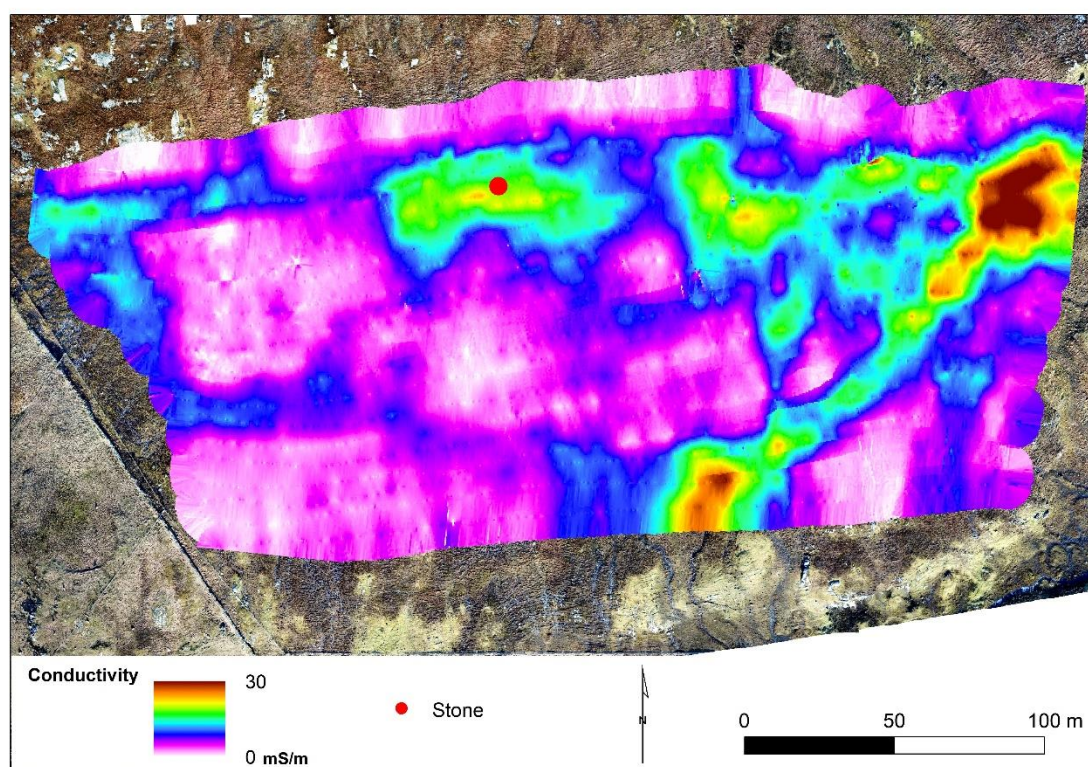

Explorer C2. Ground conductivity for CMD Explorer Coil 2.

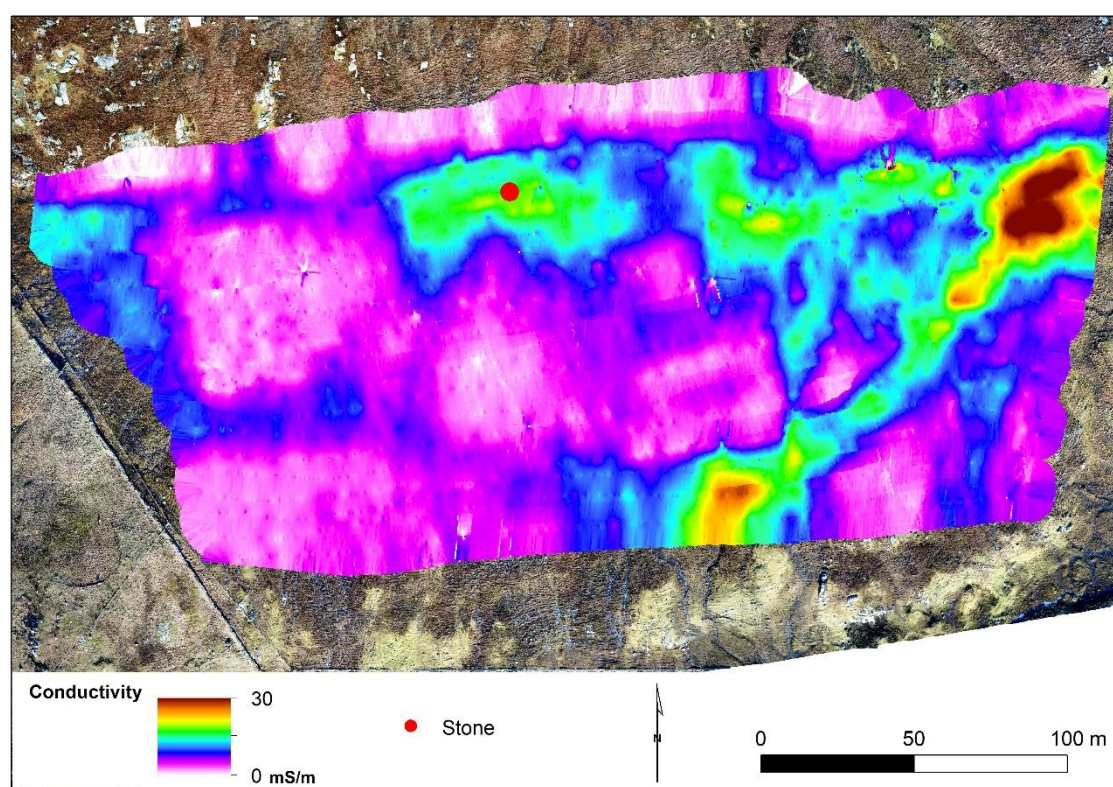

Explorer C3. Ground conductivity for CMD Explorer Coil 3.



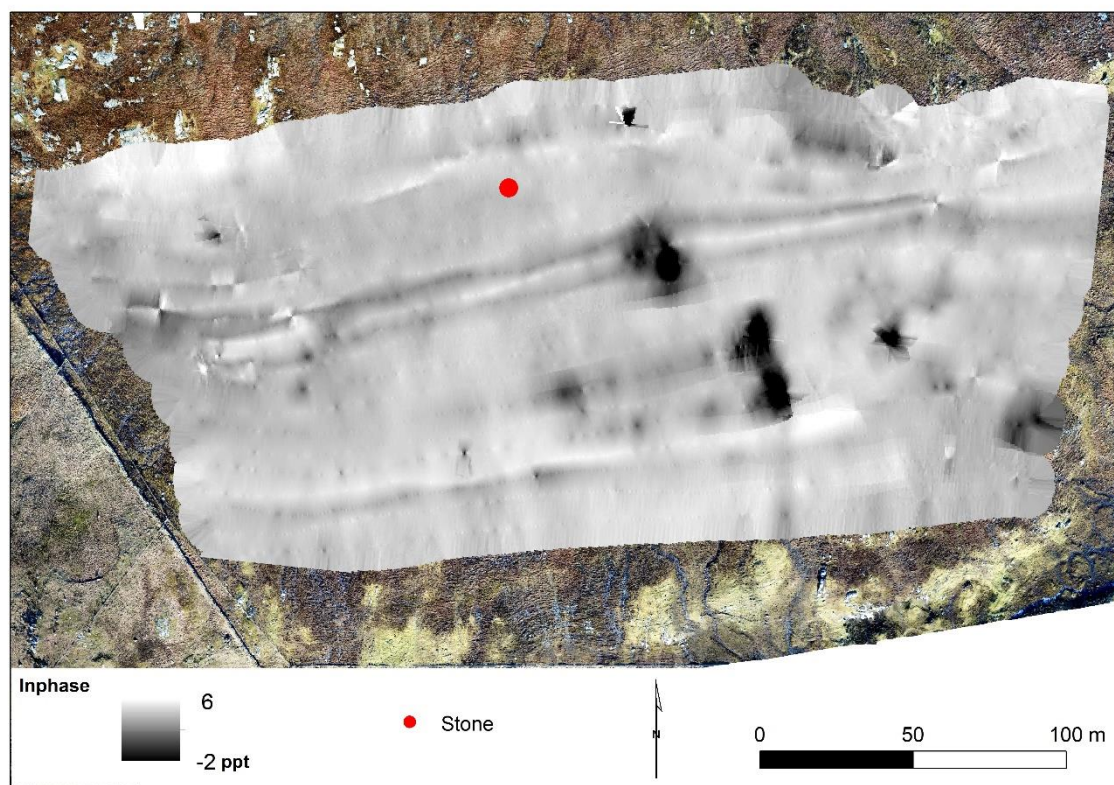

Explorer I1. Inphase for CMD Explorer Coil 1.

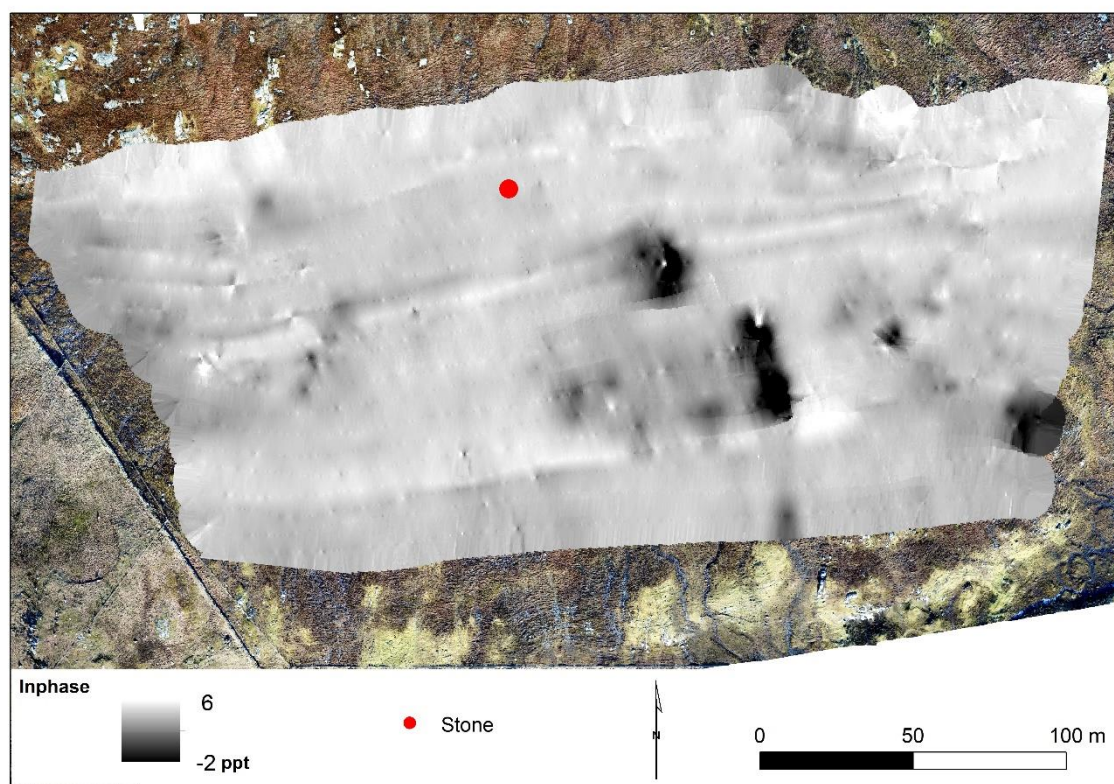

Explorer I2. Inphase for CMD Explorer Coil 2.



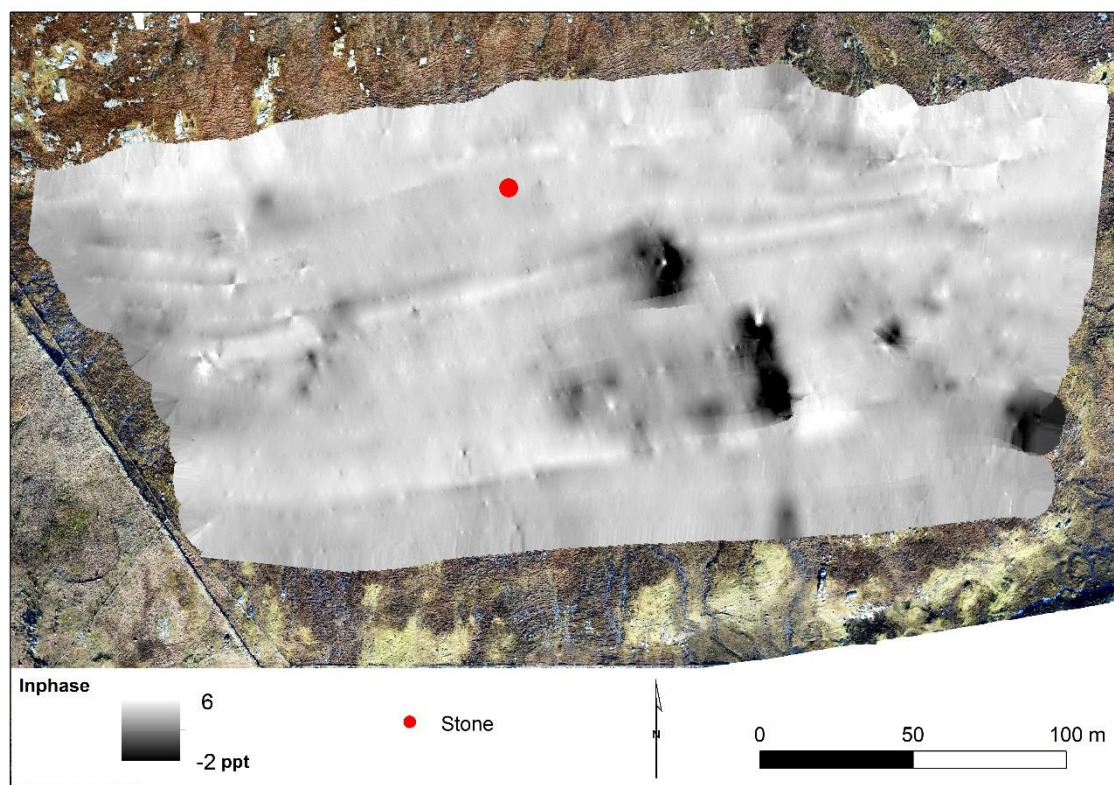

Explorer I3. Inphase for CMD Explorer Coil 3.

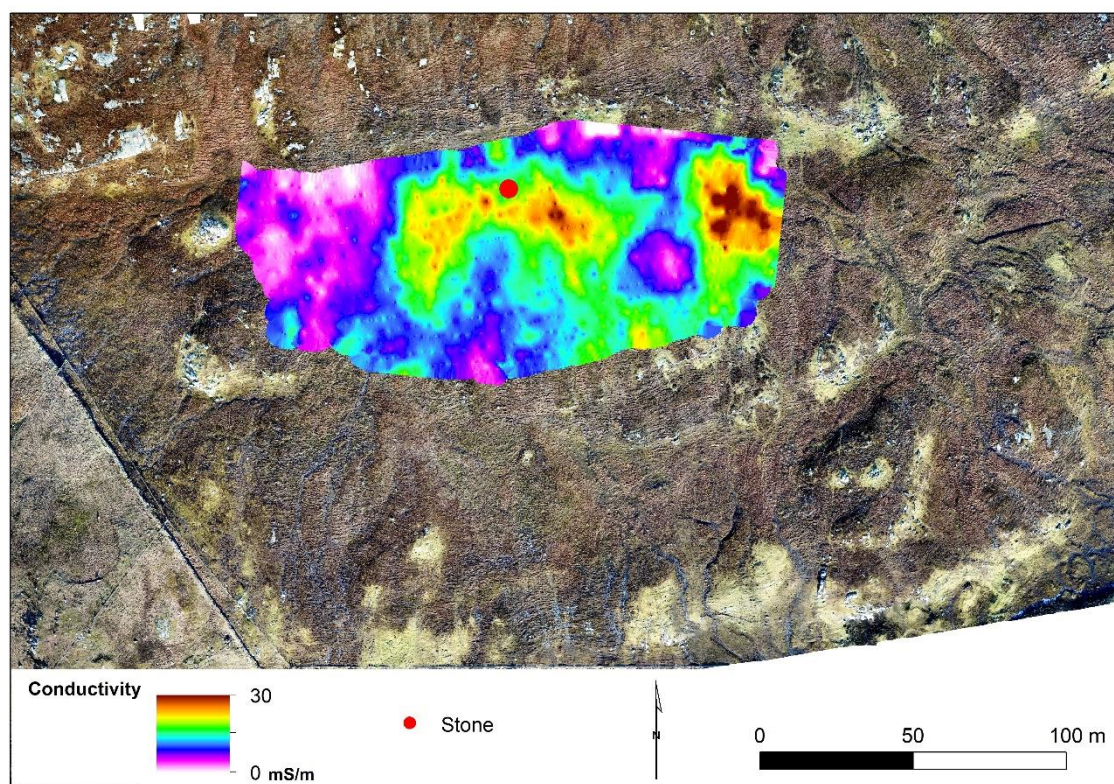

Mini C1. Ground conductivity for CMD Mini-Explorer Coil 1.



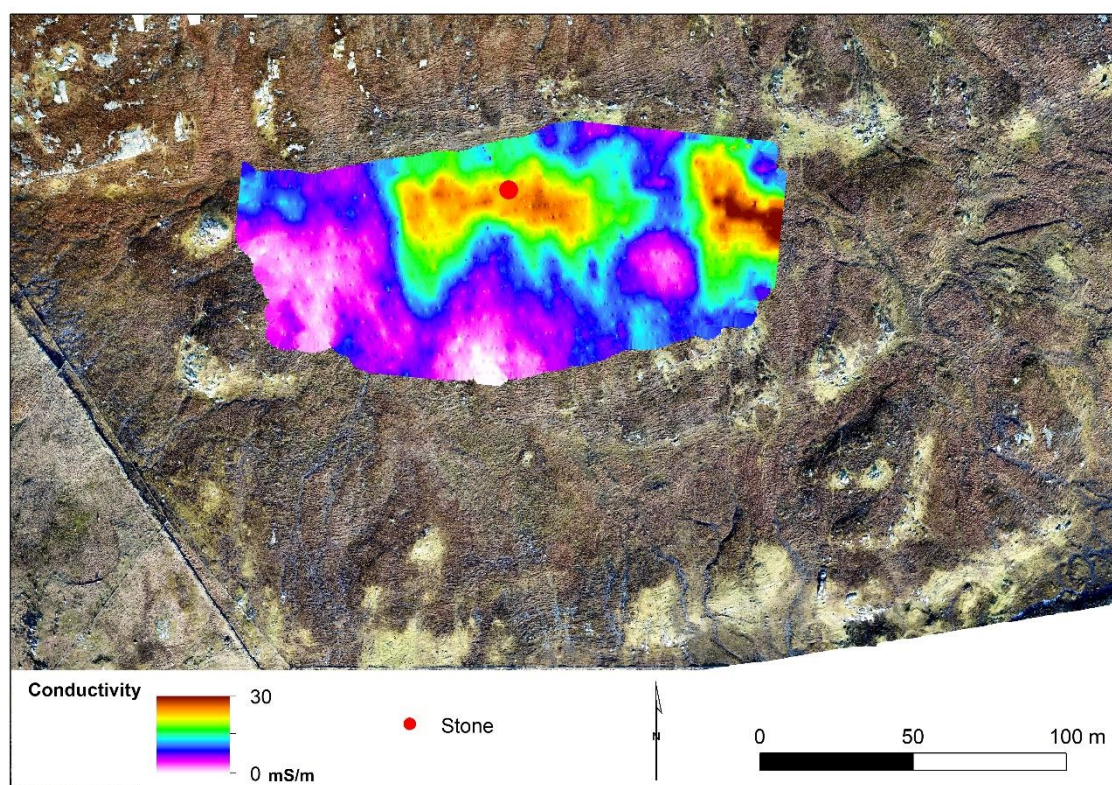

Mini C2. Ground conductivity for CMD Mini-Explorer Coil 2.

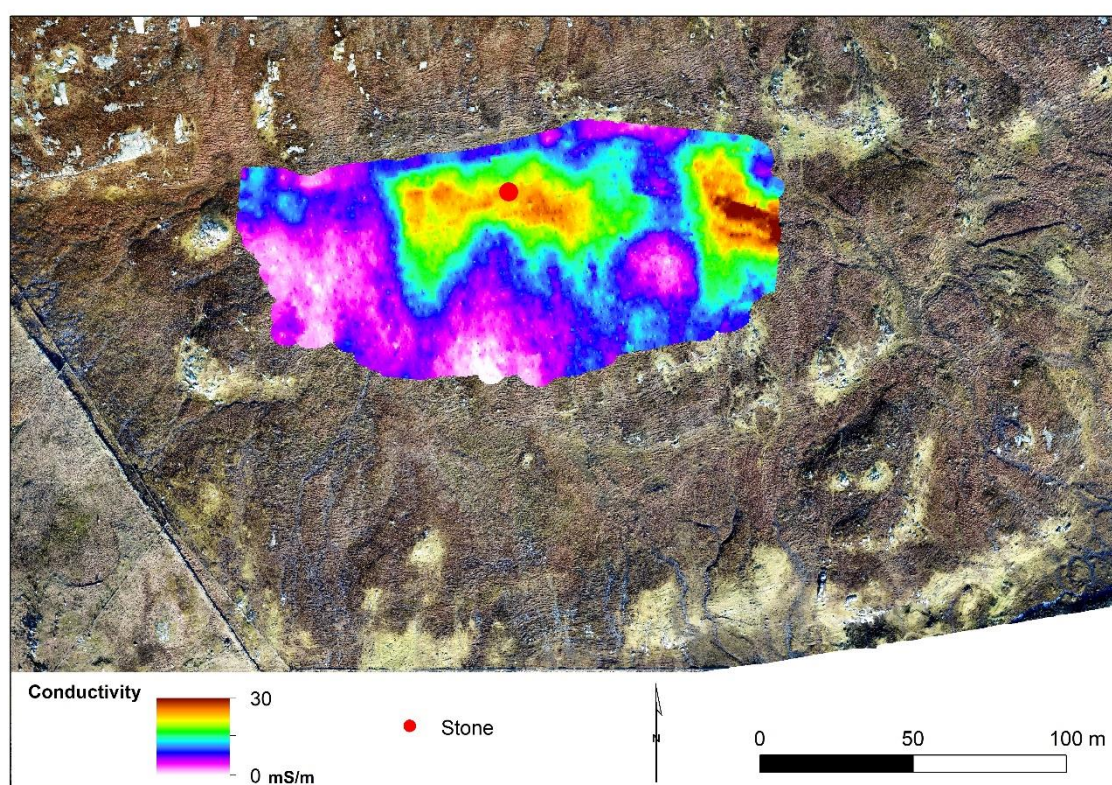

Mini C3. Ground conductivity for CMD Mini-Explorer Coil 3.



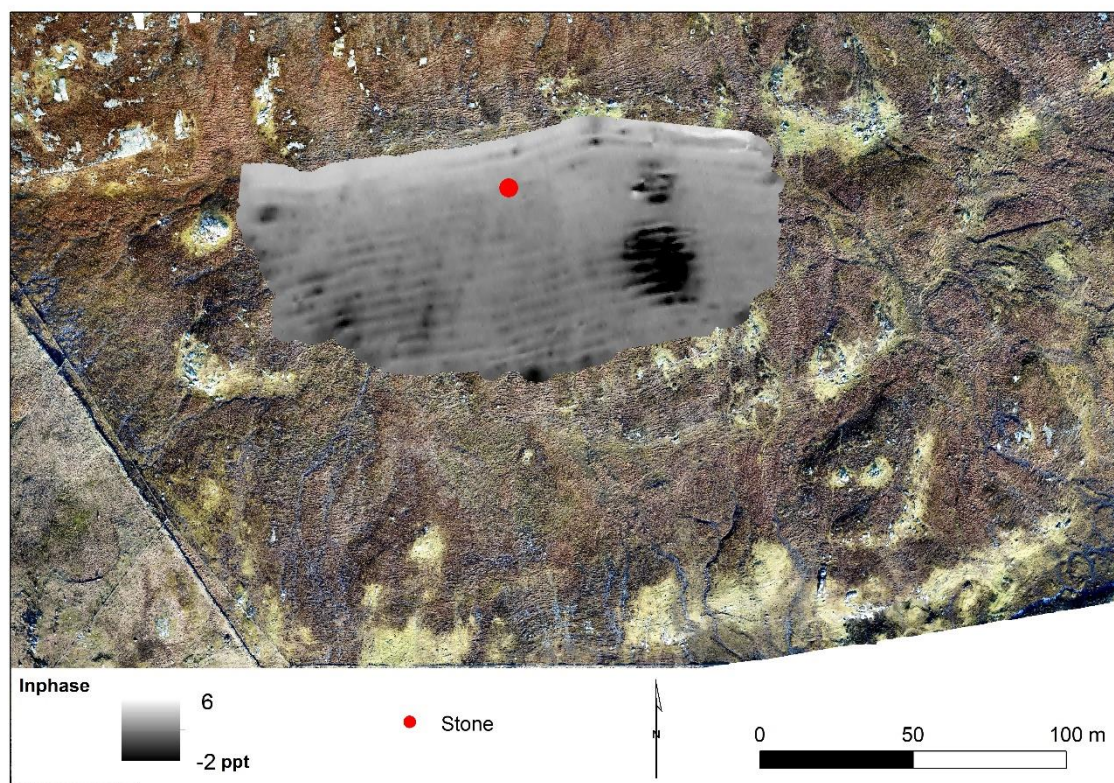

Mini I1. Inphase for CMD Mini-Explorer Coil 1.

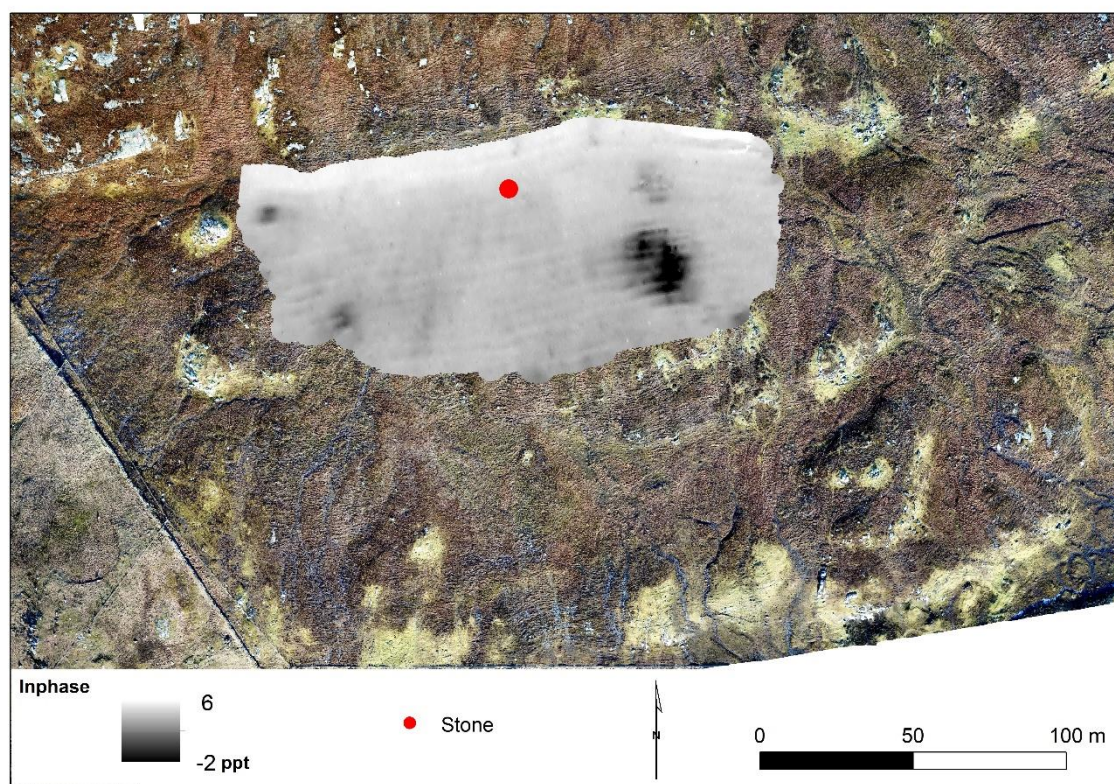

Mini I2. Inphase for CMD Mini-Explorer Coil 2.



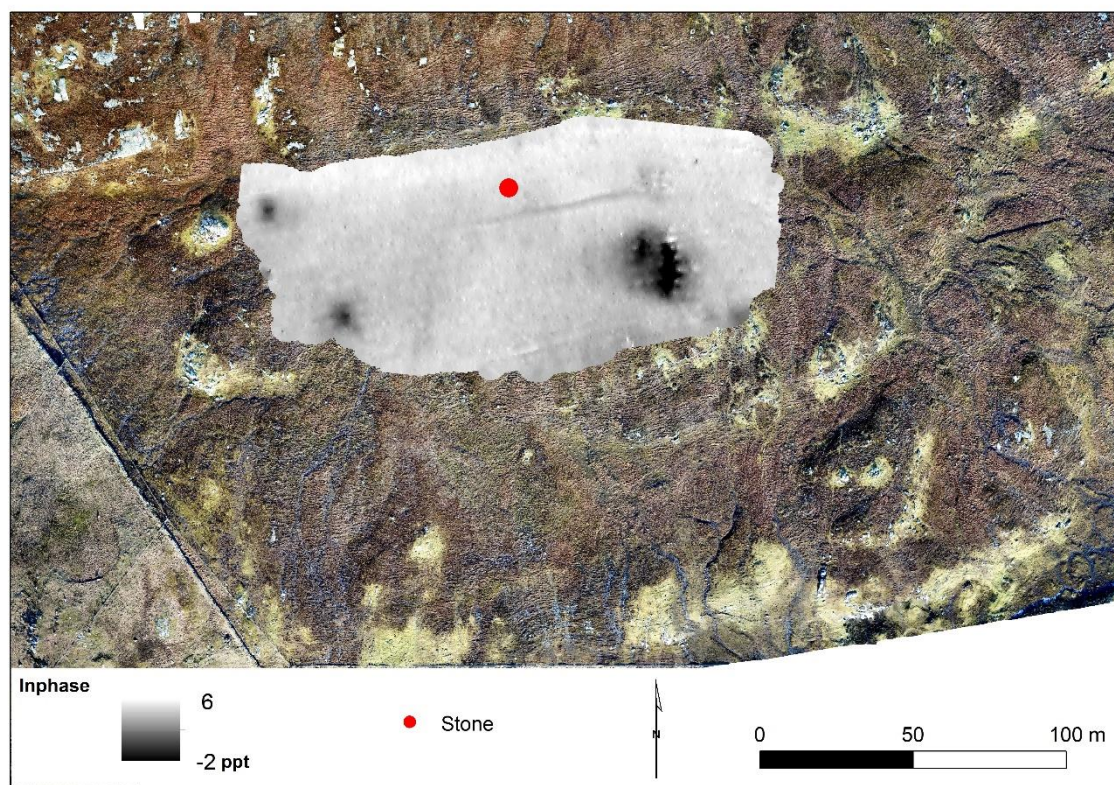

Mini I3. Inphase for CMD Mini-Explorer Coil 3.

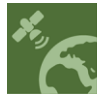**Table** Radiocarbon dates from cores 01 and 02.

| Core. | Depth (m)                              | Laboratory number | Material | Conventional Radio Carbon Age | Delta $^{13}\text{C}$ | cal B.C.    | cal B.P.    | Ascription                |
|-------|----------------------------------------|-------------------|----------|-------------------------------|-----------------------|-------------|-------------|---------------------------|
| 01    | 2.14-2.16 m<br>(-8.14 to -8.16 m O.D.) | Beta-529894       | Plant    | 10920 $\pm$ 40 B.P.           | -22.5‰                | 10908-10752 | 12857-12701 | Younger Dryas             |
| 01    | 2.23-2.25 m<br>(-8.23 to -8.25 m O.D.) | Beta-529895       | Plant    | 11300 $\pm$ 30 B.P.           | -22.1‰                | 11276-11123 | 13225-13072 | Late Glacial Interstadial |
| 02    | 1.79-1.81 m<br>(-1.79 to -1.81 m O.D.) | Beta-529896       | Plant    | 8200 $\pm$ 30 B.P.            | -23.3‰                | 7317-7083   | 9266-9032   | Early Holocene            |
| 02    | 2.01-2.03 m<br>(-2.10 to -2.03 m O.D.) | Beta-529897       | Plant    | 9290 $\pm$ 40 B.P.            | -25.5‰                | 8631-8421   | 10586-10370 | Early Holocene            |
